# Supplementary material for: Mild Choline Deficiency and MTHFD1 Synthetase Deficiency Interact to Increase Incidence of Developmental Delays and Defects in Mice
Source: MDPI journal article supplement (doi:10.3390/nu14010127), 2021-12-28
Supplement: s1 [file s1]

## Online Supplemental Material

**Table S1:** Formulation of experimental diets<sup>1</sup>

| Diet Composition (g/kg)                   | CD (TD.01369)<br>(2.5 g/kg choline bitartrate) | ChDD (TD.180221)<br>(0.8 mg/kg choline bitartrate) |
|-------------------------------------------|------------------------------------------------|----------------------------------------------------|
| L-alanine                                 | 3.5                                            | 3.5                                                |
| L-arginine HCl                            | 12.1                                           | 12.1                                               |
| L-asparagine                              | 6.0                                            | 6.0                                                |
| L-aspartic acid                           | 3.5                                            | 3.5                                                |
| L-cystine                                 | 3.5                                            | 3.5                                                |
| L-glutamic acid                           | 40.0                                           | 40.0                                               |
| Glycine                                   | 23.3                                           | 23.3                                               |
| L-histidine HCl, monohydrate              | 4.5                                            | 4.5                                                |
| L-isoleucine                              | 8.2                                            | 8.2                                                |
| L-leucine                                 | 11.1                                           | 11.1                                               |
| L-lysine HCl                              | 18.0                                           | 18.0                                               |
| L-methionine                              | 3.3                                            | 3.3                                                |
| L-phenylalanine                           | 7.5                                            | 7.5                                                |
| L-proline                                 | 3.5                                            | 3.5                                                |
| L-serine                                  | 3.5                                            | 3.5                                                |
| L-threonine                               | 8.2                                            | 8.2                                                |
| L-tryptophan                              | 1.8                                            | 1.8                                                |
| L-tyrosine                                | 5.0                                            | 5.0                                                |
| L-valine                                  | 8.2                                            | 8.2                                                |
| Sucrose                                   | 349.53                                         | 351.13                                             |
| Corn starch                               | 150.0                                          | 150.0                                              |
| Maltodextrin                              | 150.0                                          | 150.0                                              |
| Soybean oil                               | 80.0                                           | 80.0                                               |
| Cellulose                                 | 30.0                                           | 30.0                                               |
| Mineral Mix, AIN-93M-MX                   | 35.0                                           | 35.0                                               |
| Calcium phosphate, monobasic, monohydrate | 8.2                                            | 8.2                                                |
| Succinylsulfathiazole                     | 10.0                                           | 10.0                                               |
| Vitamin Mix, AIN-93-VX <sup>2</sup>       | 10.0                                           | 10.0                                               |
| Choline bitartrate                        | 2.5                                            | 0.8                                                |
| Vitamin K, menadione sodium bisulfite     | 0.05                                           | 0.05                                               |
| tert-Butylhydroquinone (TBHQ) antioxidant | 0.02                                           | 0.02                                               |
| Orange food color                         | -                                              | 0.1                                                |

<sup>1</sup> Diet formulation is based on TD.99366 (a standard amino acid defined diet; Envigo). Vitamin, mineral and choline content is based on recommendations for AIN-93G (Reeves PG. *J Nutr* 1997; 127:838S-41S); amino acid content is based on Rogers QR and Harper AE. *J Nutr* 1965; 87:267-73. Methionine content is lower than in Rogers and Harper; however, total methionine + cysteine content exceeds the minimum stated in the NRC guidelines (National Research Council. *Nutrient Requirements of Laboratory Animals*: 4th ed. Washington, DC: National Academies Press (US), 1995).

<sup>2</sup> This amount Vitamin Mix AIN-93-VX provides a final concentration of 2 mg/kg folic acid to the diet.

**Table S2:** Weights of WT and HET mice fed CD and ChDD (mean±SEM)

| Timepoint                     | Genotype | Diet | n  | Weight <sup>1</sup><br>(g) | % weight<br>gain | 2-way ANOVA   |           |                  |
|-------------------------------|----------|------|----|----------------------------|------------------|---------------|-----------|------------------|
|                               |          |      |    |                            |                  | P<br>genotype | P<br>diet | P<br>interaction |
| t=0                           | WT       | CD   | 16 | 15.92±0.28                 |                  | 0.89          | 0.19      | 0.90             |
|                               |          | ChDD | 18 | 16.43±0.36                 |                  |               |           |                  |
|                               | HET      | CD   | 18 | 16.01±0.37                 |                  |               |           |                  |
|                               |          | ChDD | 16 | 16.43±0.40                 |                  |               |           |                  |
|                               |          |      |    |                            |                  |               |           |                  |
| t=4 weeks                     | WT       | CD   | 16 | 19.76±0.29                 |                  | 0.22          | 0.91      | 0.55             |
|                               |          | ChDD | 18 | 19.96±0.30                 |                  |               |           |                  |
|                               | HET      | CD   | 18 | 19.59±0.25                 |                  |               |           |                  |
|                               |          | ChDD | 16 | 19.46±0.25                 |                  |               |           |                  |
|                               |          |      |    |                            |                  |               |           |                  |
| 0-4 weeks                     | WT       | CD   | 16 |                            | 24.52±2.11       | 0.30          | 0.14      | 0.76             |
|                               |          | ChDD | 18 |                            | 22.02±1.92       |               |           |                  |
|                               | HET      | CD   | 18 |                            | 22.97±1.82       |               |           |                  |
|                               |          | ChDD | 16 |                            | 19.16±2.53       |               |           |                  |
|                               |          |      |    |                            |                  |               |           |                  |
| Mating-<br>E10.5 <sup>1</sup> | WT       | CD   | 16 |                            | 9.90±0.99        | 0.50          | 0.08      | 0.17             |
|                               |          | ChDD | 18 |                            | 9.53±0.73        |               |           |                  |
|                               | HET      | CD   | 18 |                            | 10.59±0.82       |               |           |                  |
|                               |          | ChDD | 16 |                            | 7.57±1.26        |               |           |                  |
|                               |          |      |    |                            |                  |               |           |                  |

<sup>1</sup> Weight gain during pregnancy was determined using (total body weight at E10.5 – uterus weight) to account for differences in litter sizes

**Table S3:** Body and organ weights of WT and HET mice fed CD and ChDD (mean±SEM)

|                        | Genotype | Diet | n  | mean ± SEM  | 2-way ANOVA   |        |               |
|------------------------|----------|------|----|-------------|---------------|--------|---------------|
|                        |          |      |    |             | P genotype    | P diet | P interaction |
| Total body weight      | WT       | CD   | 16 | 23.52±0.31  | 0.0632        | 0.69   | 0.26          |
| (g)                    |          | ChDD | 18 | 23.78±0.35  |               |        |               |
|                        | HET      | CD   | 18 | 23.25±0.40  |               |        |               |
|                        |          | ChDD | 16 | 22.72±0.32  |               |        |               |
|                        |          |      |    |             |               |        |               |
| Body weight - uterus   | WT       | CD   | 16 | 22.68±0.29  | 0.10          | 0.63   | 0.27          |
| (g)                    |          | ChDD | 18 | 22.89±0.34  |               |        |               |
|                        | HET      | CD   | 18 | 22.49±0.38  |               |        |               |
|                        |          | ChDD | 16 | 21.95±0.31  |               |        |               |
|                        |          |      |    |             |               |        |               |
| Liver                  | WT       | CD   | 16 | 6.45±0.06   | <b>0.0175</b> | 0.81   | 0.52          |
| (% body weight-uterus) |          | ChDD | 18 | 6.42±0.08   |               |        |               |
|                        | HET      | CD   | 18 | 6.17±0.14   |               |        |               |
|                        |          | ChDD | 16 | 6.25±0.04   |               |        |               |
|                        |          |      |    |             |               |        |               |
| Spleen                 | WT       | CD   | 16 | 0.655±0.019 | 0.22          | 0.14   | 0.44          |
| (% body weight-uterus) |          | ChDD | 18 | 0.691±0.013 |               |        |               |
|                        | HET      | CD   | 18 | 0.647±0.017 |               |        |               |
|                        |          | ChDD | 16 | 0.659±0.015 |               |        |               |
|                        |          |      |    |             |               |        |               |

**Table S4:** Fertility of WT and HET mice fed CD and ChDD (mean±SEM)

|                                         | Genotype | Diet | n  |           | 2-way ANOVA |        |               |
|-----------------------------------------|----------|------|----|-----------|-------------|--------|---------------|
|                                         |          |      |    |           | P Genotype  | P Diet | P interaction |
| N implants                              | WT       | CD   | 16 | 10.2±0.5  | 0.81        | 0.81   | 0.43          |
|                                         |          | ChDD | 18 | 10.4±0.6  |             |        |               |
|                                         | HET      | CD   | 18 | 10.7±0.4  |             |        |               |
|                                         |          | ChDD | 16 | 10.2±0.4  |             |        |               |
| N eggs released                         | WT       | CD   | 16 | 11.9±0.6  | 0.29        | 0.58   | 0.0317        |
|                                         |          | ChDD | 18 | 12.8±0.5  |             |        |               |
|                                         | HET      | CD   | 18 | 12.6±0.6  |             |        |               |
|                                         |          | ChDD | 16 | 11.1±0.3  |             |        |               |
| implants/eggs                           | WT       | CD   | 16 | 0.87±0.05 | 0.29        | 0.86   | 0.28          |
|                                         |          | ChDD | 18 | 0.83±0.05 |             |        |               |
|                                         | HET      | CD   | 18 | 0.87±0.04 |             |        |               |
|                                         |          | ChDD | 16 | 0.92±0.02 |             |        |               |
| N resorptions                           | WT       | CD   | 16 | 2.2±0.5   | <0.0001     | 0.45   | 0.40          |
|                                         |          | ChDD | 18 | 2.2±0.3   |             |        |               |
|                                         | HET      | CD   | 18 | 4.7±0.4   |             |        |               |
|                                         |          | ChDD | 16 | 4.0±0.5   |             |        |               |
| % resorptions<br>(% of total implants)  | WT       | CD   | 16 | 20.4±4.0  | <0.0001     | 0.57   | 0.42          |
|                                         |          | ChDD | 18 | 21.3±2.9  |             |        |               |
|                                         | HET      | CD   | 18 | 44.0±3.3  |             |        |               |
|                                         |          | ChDD | 16 | 39.0±4.3  |             |        |               |
| % early resorb<br>(% of total implants) | WT       | CD   | 16 | 10.2±2.2  | 0.50        | 0.59   | 0.53          |
|                                         |          | ChDD | 18 | 7.7±1.9   |             |        |               |
|                                         | HET      | CD   | 18 | 10.3±2.1  |             |        |               |
|                                         |          | ChDD | 16 | 10.5±2.2  |             |        |               |
| % late resorb<br>(% of total implants)  | WT       | CD   | 16 | 10.2±3.1  | <0.0001     | 0.79   | 0.23          |
|                                         |          | ChDD | 18 | 13.6±3.4  |             |        |               |
|                                         | HET      | CD   | 18 | 33.7±3.5  |             |        |               |
|                                         |          | ChDD | 16 | 28.5±4.3  |             |        |               |

**Table S5:** Embryonic genotype distributions

| Maternal Genotype | Diet | Embryonic Genotype |     |      | Total <sup>a</sup> | $\chi^2$ vs expected<br><i>P</i> |
|-------------------|------|--------------------|-----|------|--------------------|----------------------------------|
|                   |      | WT                 | HET | NULL |                    |                                  |
| WT                | CD   | 63                 | 64  | -    | 127                | 0.93                             |
|                   | ChDD | 78                 | 73  | -    | 151                | 0.68                             |
| HET               | CD   | 33                 | 77  | 21   | 131                | 0.0442                           |
|                   | ChDD | 34                 | 68  | 17   | 119                | 0.0262                           |

<sup>a</sup> excludes embryos that could not be genotyped: (2 CD WT, 2 CD HET, 3 ChDD HET).

**Table S6:** Effect of maternal genotype, diet, and embryonic genotype on the incidence of delays and defects

|                      | Maternal Genotype | Diet | n litters | Embryo Genotype | n embryos evaluated | n affected embryos | n affected litters |
|----------------------|-------------------|------|-----------|-----------------|---------------------|--------------------|--------------------|
| Delay <sup>1</sup>   | WT                | CD   | 16        | WT              | 63                  | 9                  | 10                 |
|                      |                   |      |           | HET             | 64                  | 7                  |                    |
|                      |                   | ChDD | 18        | WT              | 78                  | 12                 | 13                 |
|                      |                   |      |           | HET             | 73                  | 15                 |                    |
|                      | HET               | CD   | 18        | WT              | 33                  | 10                 | 12                 |
|                      |                   |      |           | HET             | 77                  | 15                 |                    |
|                      |                   | ChDD | 16        | WT              | 34                  | 4                  | 14                 |
|                      |                   |      |           | HET             | 68                  | 20                 |                    |
| Defects <sup>2</sup> | WT                | CD   | 16        | WT              | 63                  | 6                  | 7                  |
|                      |                   |      |           | HET             | 64                  | 3                  |                    |
|                      |                   | ChDD | 18        | WT              | 78                  | 14                 | 14                 |
|                      |                   |      |           | HET             | 73                  | 16 <sup>a</sup>    |                    |
|                      | HET               | CD   | 18        | WT              | 33                  | 9                  | 11                 |
|                      |                   |      |           | HET             | 77                  | 10                 |                    |
|                      |                   | ChDD | 16        | WT              | 34                  | 1                  | 10                 |
|                      |                   |      |           | HET             | 68                  | 12                 |                    |

<sup>1</sup> Delay:  $P_{\text{maternal genotype}} = 0.0663$ ,  $P_{\text{diet}} = 0.33$ ,  $P_{\text{embryonic genotype}} = 0.22$ ,  $P_{\text{diet} \times \text{embryonic genotype}} = 0.0305$ ; binary logistic regression including litter as a random effect.

41 delayed embryos also had defects (out of 92)

<sup>2</sup> Defects:  $P_{\text{maternal genotype}} = 0.0167$ ,  $P_{\text{diet}} = 0.33$ ,  $P_{\text{embryonic genotype}} = 0.0333$ ,  $P_{\text{diet} \times \text{maternal genotype}} = 0.0043$ ,  $P_{\text{diet} \times \text{embryonic genotype}} = 0.0072$ ; binary logistic regression including litter as a random effect.

41 embryos with defects also were delayed (out of 71)

<sup>a</sup> significantly different from CD with same maternal/embryonic genotypes ( $P=0.0030$ , post hoc by mvt)

**Table S7:** Hepatic choline and methylation metabolites in pregnant *WT* and *HET* mice fed CD and ChDD (n = 6/group, mean±SEM)

| Metabolite              | Genotype | Diet | Concentration (nmol/g) | 2-way ANOVA |                    |               |
|-------------------------|----------|------|------------------------|-------------|--------------------|---------------|
|                         |          |      |                        | P Genotype  | P Diet             | P interaction |
| Choline                 | WT       | CD   | 375.31±30.08           | 0.08        | <b>0.0380</b>      | 0.82          |
|                         |          | ChDD | 320.43±26.31           |             |                    |               |
|                         | HET      | CD   | 331.06±22.63           |             |                    |               |
|                         |          | ChDD | 263.78±30.23           |             |                    |               |
| Betaine                 | WT       | CD   | 280.01±25.94           | 0.86        | <b>&lt; 0.0001</b> | 0.72          |
|                         |          | ChDD | 121.50±11.15           |             |                    |               |
|                         | HET      | CD   | 276.10±20.96           |             |                    |               |
|                         |          | ChDD | 132.56±21.50           |             |                    |               |
| Phosphocholine          | WT       | CD   | 722.70±98.27           | 0.86        | <b>0.0001</b>      | 0.67          |
|                         |          | ChDD | 421.42±59.43           |             |                    |               |
|                         | HET      | CD   | 739.88±51.48           |             |                    |               |
|                         |          | ChDD | 377.99±65.82           |             |                    |               |
| Dimethylglycine         | WT       | CD   | 22.39±2.57             | 0.65        | <b>0.0002</b>      | 0.83          |
|                         |          | ChDD | 13.06±1.51             |             |                    |               |
|                         | HET      | CD   | 22.87±1.63             |             |                    |               |
|                         |          | ChDD | 14.39±2.07             |             |                    |               |
| Methionine              | WT       | CD   | 78.65±5.64             | 0.88        | 0.88               | 0.77          |
|                         |          | ChDD | 80.94±6.60             |             |                    |               |
|                         | HET      | CD   | 80.93±2.84             |             |                    |               |
|                         |          | ChDD | 80.22±4.81             |             |                    |               |
| Glycerophosphocholine   | WT       | CD   | 439.77±65.05           | 0.87        | 0.50               | 0.33          |
|                         |          | ChDD | 369.58±35.90           |             |                    |               |
|                         | HET      | CD   | 405.58±24.81           |             |                    |               |
|                         |          | ChDD | 417.99±28.41           |             |                    |               |
| Phosphatidylcholine     | WT       | CD   | 24617±1876             | 0.93        | 0.73               | 0.99          |
|                         |          | ChDD | 24211±788              |             |                    |               |
|                         | HET      | CD   | 24734±900              |             |                    |               |
|                         |          | ChDD | 24301±773              |             |                    |               |
| Sphingomyelin           | WT       | CD   | 2148±117               | 0.20        | 0.73               | 0.0612        |
|                         |          | ChDD | 2023±48                |             |                    |               |
|                         | HET      | CD   | 1895±59                |             |                    |               |
|                         |          | ChDD | 2073±62                |             |                    |               |
| Lysophosphatidylcholine | WT       | CD   | 491.28±36.19           | 0.39        | 0.93               | 0.75          |
|                         |          | ChDD | 480.06±18.54           |             |                    |               |
|                         | HET      | CD   | 506.11±25.85           |             |                    |               |
|                         |          | ChDD | 512.39±22.73           |             |                    |               |
| S-adenosylmethionine    | WT       | CD   | 53.62±4.32             | 0.29        | 0.59               | 0.13          |
|                         |          | ChDD | 48.55±3.31             |             |                    |               |
|                         | HET      | CD   | 40.30±5.89             |             |                    |               |
|                         |          | ChDD | 50.89±6.06             |             |                    |               |
| S-adenosylhomocysteine  | WT       | CD   | 37.65±2.05             | 0.0574      | 0.11               | 0.23          |
|                         |          | ChDD | 36.20±1.41             |             |                    |               |
|                         | HET      | CD   | 48.58±5.94             |             |                    |               |
|                         |          | ChDD | 38.82±1.91             |             |                    |               |
| SAM/SAH                 | WT       | CD   | 1.455±0.162            | 0.15        | 0.37               | 0.14          |
|                         |          | ChDD | 1.347±0.089            |             |                    |               |
|                         | HET      | CD   | 0.937±0.199            |             |                    |               |
|                         |          | ChDD | 1.355±0.207            |             |                    |               |

**Table S8:** Lipid metabolites in pregnant *WT* and *HET* mice fed CD and ChDD (n = 6/group, mean±SEM)

| Metabolite                              | Genotype | Diet | Concentration<br>(µg/mg ptn) | 2-way ANOVA   |               |                  |
|-----------------------------------------|----------|------|------------------------------|---------------|---------------|------------------|
|                                         |          |      |                              | P<br>Genotype | P Diet        | P<br>interaction |
| Triacylglycerol<br>(TAG)                | WT       | CD   | 180.2±8.3                    | 0.23          | 0.15          | 0.64             |
|                                         |          | ChDD | 191.7±6.2                    |               |               |                  |
|                                         | HET      | CD   | 160.3±12.1                   |               |               |                  |
|                                         |          | ChDD | 182.8±16.6                   |               |               |                  |
| Free cholesterol                        | WT       | CD   | 27.10±0.46                   | 0.38          | 0.51          | 0.85             |
|                                         |          | ChDD | 26.52±0.60                   |               |               |                  |
|                                         | HET      | CD   | 27.57±0.29                   |               |               |                  |
|                                         |          | ChDD | 27.25±1.05                   |               |               |                  |
| Phosphatidyl-<br>ethanolamine<br>(PtdE) | WT       | CD   | 40.10±1.03                   | 0.38          | 0.23          | 0.75             |
|                                         |          | ChDD | 38.83±0.99                   |               |               |                  |
|                                         | HET      | CD   | 39.31±1.20                   |               |               |                  |
|                                         |          | ChDD | 37.14±2.05                   |               |               |                  |
| Phosphatidyl-<br>choline (PtdCho)       | WT       | CD   | 72.76±1.23                   | 0.79          | 0.35          | 0.63             |
|                                         |          | ChDD | 71.64±2.50                   |               |               |                  |
|                                         | HET      | CD   | 73.29±1.98                   |               |               |                  |
|                                         |          | ChDD | 69.82±3.35                   |               |               |                  |
| PtdCho:PtdE                             | WT       | CD   | 1.817±0.023                  | 0.0620        | 0.33          | 0.86             |
|                                         |          | ChDD | 1.844±0.028                  |               |               |                  |
|                                         | HET      | CD   | 1.866±0.015                  |               |               |                  |
|                                         |          | ChDD | 1.885±0.023                  |               |               |                  |
| PtdCho:TAG                              | WT       | CD   | 0.409±0.024                  | 0.094         | <b>0.0167</b> | 0.35             |
|                                         |          | ChDD | 0.374±0.008                  |               |               |                  |
|                                         | HET      | CD   | 0.467±0.026 <sup>a</sup>     |               |               |                  |
|                                         |          | ChDD | 0.391±0.022                  |               |               |                  |

<sup>a</sup> significantly different from WT ChDD (P=0.0272, Tukey post hoc), P=0.0862 in comparison with HET ChDD.
